# Supplementary material
Source: publisher figshare collection journal article supplement (https://karger.figshare.com/ndownloader/files/22295103)
Supplement: Supplementary file 1 [file 22295103]

**Supplementary Material for**

**“Testing the interpersonal-cognitive model of auditory verbal hallucinations**

**in a transdiagnostic youth sample”**

This file includes:

Supplementary Tables 1 & 2

**Supplementary Table 1.** Mediation analyses in order to test the hypothesis “interpersonal schemata as primary” in a transdiagnostic youth sample (n=43).

|  |  | Outcome variable | | | | | | | | | | | | |
| --- | --- | --- | --- | --- | --- | --- | --- | --- | --- | --- | --- | --- | --- | --- |
|  |  | BAVQ-R malevolence | | | | | |  | DASS-21 depression | | | | | |
|  |  | B | SE | | | | *p* |  | B | SE | | *p* | | |
| Constant |  | 5.65 | 1.10 | | | | <.001*** |  | 3.56 | 1.76 | | .060 | | |
| BCSS negative-self | *a* | 0.43 | 0.09 | | | | <.001*** | *c’* | 0.60 | 0.14 | | <.001*** | | |
| BAVQ-R malevolence |  | - | - | | | | - | *b* | 0.20 | 0.19 | | .328 | | |
|  |  | *R2*=.36, *F*(1, 41)=22.87, *p*<.001*** | | | | | |  | *R2*=.49, *F*(2, 40)=9.23, *p*<.001*** | | | | | |
|  |  | Outcome variable | | | | | | | | | | | | |
|  |  | BAVQ-R malevolence | | | | | |  | DASS-21 depression | | | | | |
|  |  | B | SE | | | | *p* |  | B | SE | | *p* | | |
| Constant |  | 7.92 | 1.29 | | | | <.001*** |  | 2.79 | 2.11 | | .197 | | |
| BCSS negative-other | *a* | 0.24 | 0.12 | | | | .052 | *c’* | 0.35 | 0.14 | | .020* | | |
| BAVQ-R malevolence |  | - | - | | | | - | *b* | 0.56 | 0.18 | | .004** | | |
|  |  | *R2*=.09, *F*(1, 41)=4.00, *p*=.052 | | | | | |  | *R2*=.35, *F*(2, 40)=10.90, *p*<.001*** | | | | | |
|  |  | Outcome variable | | | | | | | | | | | | |
|  |  | BAVQ-R omnipotence | | | | | |  | DASS-21 depression | | | | | |
|  |  | B | SE | | | | *p* |  | B | SE | | *p* | | |
| Constant |  | 9.24 | 1.01 | | | | <.001*** |  | 3.56 | 2.43 | | .178 | | |
| BCSS negative-self | *a* | 0.24 | 0.08 | | | | .006** | *c’* | 0.65 | 0.12 | | <.001*** | | |
| BAVQ-R omnipotence |  | - | - | | | | - | *b* | 0.12 | 0.22 | | .563 | | |
|  |  | *R2*=.17, *F*(1, 41)=8.53, *p*=.007** | | | | | |  | *R2*=.48, *F*(2, 40)=18.54, *p*<.001*** | | | | | |
|  |  | Outcome variable | | | | | | | | | | | | |
|  |  | BAVQ-R omnipotence | | | | | |  | DASS-21 depression | | | | | |
|  |  | B | | SE | | *p* | |  | B | SE | | | *p* | |
| Constant |  | 10.74 | | 1.07 | | <.001*** | |  | 2.11 | 2.99 | | | .489 | |
| BCSS negative-other | *a* | 0.10 | | 0.10 | | .271 | | *c’* | 0.43 | 0.15 | | | .005** | |
| BAVQ-R omnipotence |  | - | | - | | - | | *b* | 0.48 | 0.23 | | | .053 | |
|  |  | *R2*=.03, *F*(1, 41)=1.14, *p*=.271 | | | | | |  | *R2*=.28, *F*(2, 40)=7.66, *p*=.002** | | | | | |
|  |  | Outcome variable | | | | | | | | | | | | |
|  |  | BAVQ-R persecutory beliefs | | | | | |  | DASS-21 depression | | | | | |
|  |  | B | | SE | | *p* | |  | B | | SE | | *p* | |
| Constant |  | 14.92 | | 1.87 | | <.001*** | |  | 2.93 | | 2.27 | | .205 | |
| BCSS negative-self | *a* | 0.66 | | 0.15 | | <.001*** | | *c’* | 0.61 | | 0.14 | | <.001*** | |
| BAVQ-R persecutory beliefs |  | - | | - | | - | | *b* | 0.11 | | 0.12 | | .362 | |
|  |  | *R2*=.33, *F*(1, 40)=19.66, *p*<.001*** | | | | | |  | *R2*=.49, *F*(2, 39)=18.85, *p*<.001*** | | | | | |
|  |  | Outcome variable | | | | | | | | | | | | |
|  |  | BAVQ-R persecutory beliefs | | | | | |  | DASS-21 depression | | | | | |
|  |  | B | | | SE | *p* | |  | B | | SE | | | *p* |
| Constant |  | 18.67 | | | 2.13 | <.001*** | |  | 1.02 | | 2.66 | | | .703 |
| BCSS negative-other |  | 0.34 | | | 0.19 | .081 | |  | 0.37 | | 0.15 | | | .077 |
| BAVQ-R persecutory beliefs |  | - | | | - | - | |  | 0.34 | | 0.12 | | | .006** |
|  |  | *R2*=.07, *F*(1, 40)=3.21, *p*=.081 | | | | | |  | *R2*=.34, *F*(2, 39)=10.22, *p*<.001*** | | | | | |
|  |  | Outcome variable | | | | | | | | | | | | |
|  |  | Voice Rank Scale | | | | | |  | DASS-21 depression | | | | | |
|  |  | B | SE | | | | *p* |  | B | SE | | *p* | | |
| Constant |  | 17.36 | 5.18 | | | | .002** |  | 22.88 | 2.51 | | <.001*** | | |
| Social Comparison Scale | *a* | 0.61 | 0.12 | | | | <.001*** | *c’* | -0.16 | 0.06 | | .025* | | |
| Voice Rank Scale |  | - | - | | | | - | *b* | -0.11 | 0.07 | | .115 | | |
|  |  | *R2*=.40, *F*(1, 41)=27.69, *p*<.001*** | | | | | |  | *R2*=.37, *F*(2, 40)=11.58, *p*<.001*** | | | | | |

*Notes.* BAVQ-R, Beliefs About Voices Questionnaire-Revised; BCSS, Brief Core Schemata Scales; DASS-21, Depression Anxiety Stress Scale; Significant at: *, *p* < .05; **, *p* < .01; ***, *p* < .001.

**Supplementary Table 2.** Mediation analyses in order to test the hypothesis “psychosis as primary” in a transdiagnostic youth sample (n=43).

|  |  | Outcome variable | | | | | | | | | | |
| --- | --- | --- | --- | --- | --- | --- | --- | --- | --- | --- | --- | --- |
|  |  | BCSS negative-self | | | | | |  | DASS-21 depression | | | |
|  |  | B | | SE | | | *p* |  | B | SE | | *p* |
| Constant |  | 1.88 | | 1.96 | | | .329 |  | 3.56 | 1.76 | | .060 |
| BAVQ-R malevolence | *a* | 0.84 | | 0.18 | | | <.001*** | *c’* | 0.20 | 0.19 | | .328 |
| BCSS negative-self |  |  | |  | | |  | *b* | 0.60 | 0.14 | | <.001*** |
|  |  | *R2*=.36, *F*(1, 41)=22.87, *p*<.001*** | | | | | |  | *R2*=.49, *F*(2, 40)=19.23, *p*<.001*** | | | |
|  |  | Outcome variable | | | | | | | | | | |
|  |  | BCSS negative-other | | | | | |  | DASS-21 depression | | | |
|  |  | B | | SE | | | *p* |  | B | SE | | *p* |
| Constant |  | 5.34 | | 2.14 | | | .020* |  | 2.79 | 2.11 | | .197 |
| BAVQ-R malevolence | *a* | 0.38 | | 0.19 | | | .052 | *c’* | 0.56 | 0.18 | | .004** |
| BCSS negative-other |  |  | |  | | |  | *b* | 0.35 | 0.14 | | .020* |
|  |  | *R2*=.09, *F*(1, 41)=4.00, *p*=.052 | | | | | |  | *R2*=.35, *F*(2, 40)=10.90, *p*<.001*** | | | |
|  |  | Outcome variable | | | | | | | | | | |
|  |  | BCSS negative-self | | | | | |  | DASS-21 depression | | | |
|  |  | B | | SE | | | *p* |  | B | SE | | *p* |
| Constant |  | 1.84 | | 3.06 | | | .535 |  | 3.56 | 2.43 | | .178 |
| BAVQ-R omnipotence | *a* | 0.72 | | 0.25 | | | .006** | *c’* | 0.12 | 0.22 | | .563 |
| BCSS negative-self |  | - | | - | | | - | *b* | 0.65 | 0.12 | | <.001*** |
|  |  | *R2*=.17, *F*(1, 41)=8.53, *p*=.006** | | | | | |  | *R2*=.48, *F*(2, 40)=18.54, *p*<.001*** | | | |
|  |  | Outcome variable | | | | | | | | | | |
|  |  | BCSS negative-other | | | | | |  | DASS-21 depression | | | |
|  |  | B | SE | | | *p* | |  | B | SE | | *p* |
| Constant |  | 6.12 | 3.04 | | | .065 | |  | 2.11 | 2.99 | | .490 |
| BAVQ-R omnipotence | *a* | .26 | .25 | | | .271 | | *c’* | .48 | .23 | | .053 |
| BCSS negative-other |  | - | - | | | - | | *b* | .43 | .15 | | .006** |
|  |  | *R2*=.03, *F*(1, 41)=1.14, *p*=.271 | | | | | |  | *R2*=.28, *F*(2, 40)=7.66, *p*=.002** | | | |
|  |  | Outcome variable | | | | | | | | | | |
|  |  | BCSS negative-self | | | | | |  | DASS-21 depression | | | |
|  |  | B | | | SE | *p* | |  | B | | SE | *p* |
| Constant |  | -0.44 | | | 2.60 | .866 | |  | 2.93 | | 2.27 | .205 |
| BAVQ-R persecutory beliefs | *a* | 0.50 | | | 0.11 | <.001*** | | *c’* | 0.11 | | 0.12 | .362 |
| BCSS negative-self |  | - | | | - | - | | *b* | 0.61 | | 0.14 | <.001*** |
|  |  | *R2*=.33, *F*(1, 40)=19.66, *p*<.001*** | | | | | |  | *R2*=.49, *F*(2, 39)=18.85, *p*<.001*** | | | |
|  |  | Outcome variable | | | | | | | | | | |
|  |  | BCSS negative-other | | | | | |  | DASS-21 depression | | | |
|  |  | B | | | SE | *p* | |  | B | | SE | *p* |
| Constant |  | 4.40 | | | 2.79 | .123 | |  | 1.02 | | 2.66 | .703 |
| BAVQ-R persecutory beliefs |  | 0.22 | | | 0.12 | .081 | |  | 0.33 | | 0.11 | .006 |
| BCSS negative-other |  | - | | | - | - | |  | 0.37 | | 0.15 | .015* |
|  |  | *R2*=.07, *F*(1, 40)=3.21, *p*=.081 | | | | | |  | *R2*=.34, *F*(2, 39)=10.22, *p*<.001*** | | | |
|  |  | Outcome variable | | | | | | | | | | |
|  |  | Social Comparison Scale | | | | | |  | DASS-21 depression | | | |
|  |  | B | | SE | | | *p* |  | B | SE | | *p* |
| Constant |  | 13.20 | | 5.74 | | | .015* |  | 22.88 | 2.51 | | <.001*** |
| Voice Rank Scale | *a* | 0.66 | | 0.13 | | | <.001*** | *c’* | -0.11 | 0.07 | | .115 |
| Social Comparison Scale |  | - | | - | | | - | *b* | -0.16 | 0.06 | | .025* |
|  |  | *R2*=.40, *F*(1, 41)=27.69, *p*<.001*** | | | | | |  | *R2*=.37, *F*(2, 40)=11.58, *p*<.001*** | | | |

*Notes.* BAVQ-R, Beliefs About Voices Questionnaire-Revised; BCSS, Brief Core Schemata Scales; DASS-21, Depression Anxiety Stress Scale; Significant at: *, *p* < .05; **, *p* < .01; ***, *p* < .001.
